# Supplementary material for: Thermostable iron oxide nanoparticle synthesis within recombinant ferritins from the hyperthermophile Pyrococcus yayanosii CH1
Source: Royal Society of Chemistry journal article supplement (doi:10.1039/c9ra07397c), 2019-01-01
Supplement: c9ra07397c1.pdf [file c9ra07397c1.pdf]

**Thermostable iron oxide nanoparticle synthesis within recombinant  
ferritins from the hyperthermophile *Pyrococcus yayanosii* CH1**

*Jiacheng Yu*<sup>a,b,c</sup>, *Tongwei Zhang*<sup>a,b</sup>, *Huangtao Xu*<sup>a,b,c</sup>, *Xiaoli Dong*<sup>d</sup>, *Yao Cai*<sup>a,b</sup>, *Yongxin Pan*<sup>a,b,c</sup>, and *Changqian Cao*<sup>a,b,c,\*</sup>

<sup>a</sup>Biogeomagnetism Group, Paleomagnetism and Geochronology Laboratory, Key Laboratory of Earth and Planetary Physics, Institute of Geology and Geophysics, Chinese Academy of Sciences, Beijing 100029, P. R. China

<sup>b</sup>Innovation Academy for Earth Science, CAS, Beijing 100029, P. R. China

<sup>c</sup>College of Earth Sciences, University of Chinese Academy of Sciences, Beijing 100049, P. R. China

<sup>d</sup>Department of Geoscience, University of Calgary, Calgary, AB, T2N 1N4, Canada

\*Corresponding author, email: [changqiancao@mail.iggcas.ac.cn](mailto:changqiancao@mail.iggcas.ac.cn)

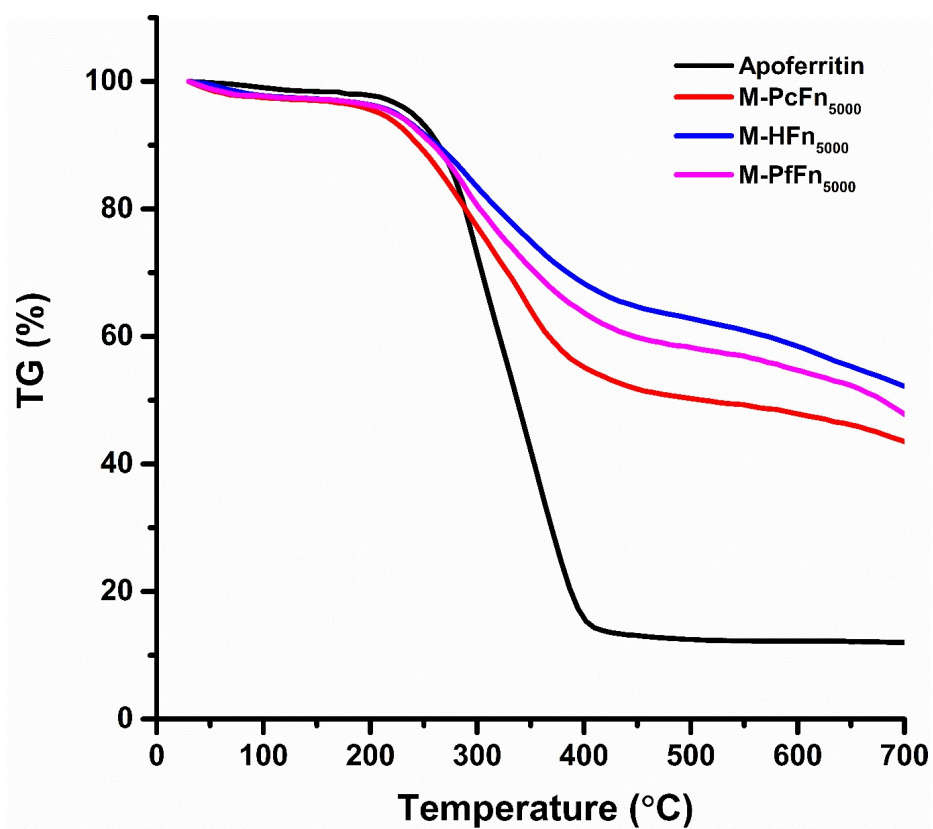

**Figure S1.** Thermogravimetry characterization of M-HFn<sub>5000</sub>, M-PfFn<sub>5000</sub>, and M-PcFn<sub>5000</sub> nanoparticles.

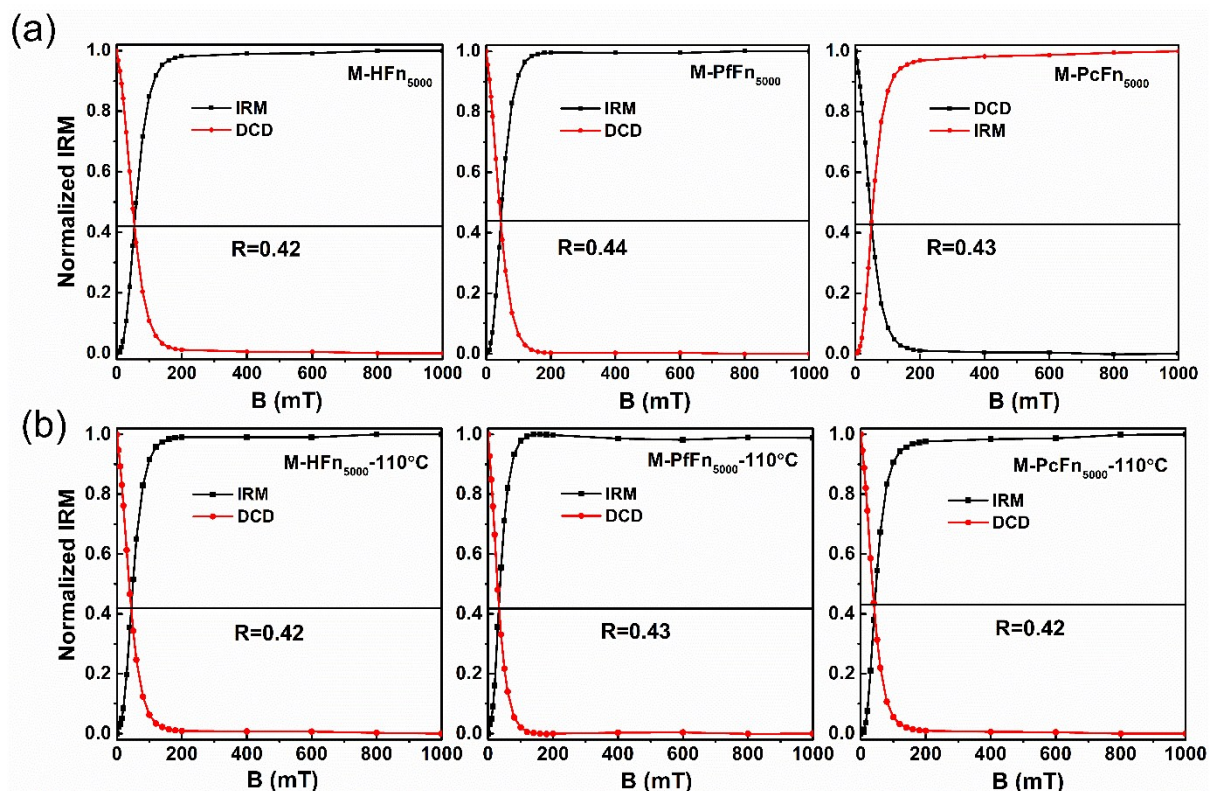

**Figure S2.** Remanence data of magnetoferritins measured at 5 K. Normalized isothermal remanent magnetization (IRM) acquisition and direct current demagnetization (DCD) of M-HFn<sub>5000</sub>, M-PfFn<sub>5000</sub>, and M-PcFn<sub>5000</sub> particles before (a) and after (b) heating at 110 °C.

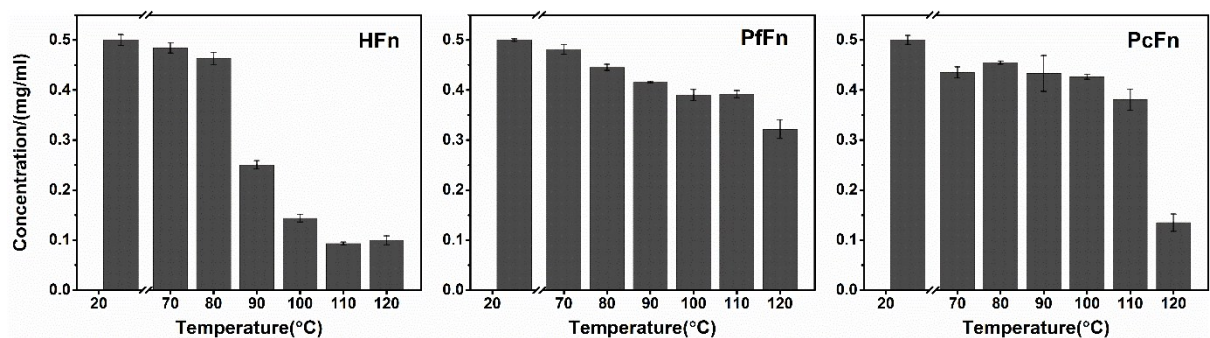

**Figure S3.** Protein concentrations of HFn, PfFn, and PcFn after heating by temperature gradient (control group of 25 °C, 70 °C, 80 °C, 90 °C, 100 °C, 110 °C, 120 °C)

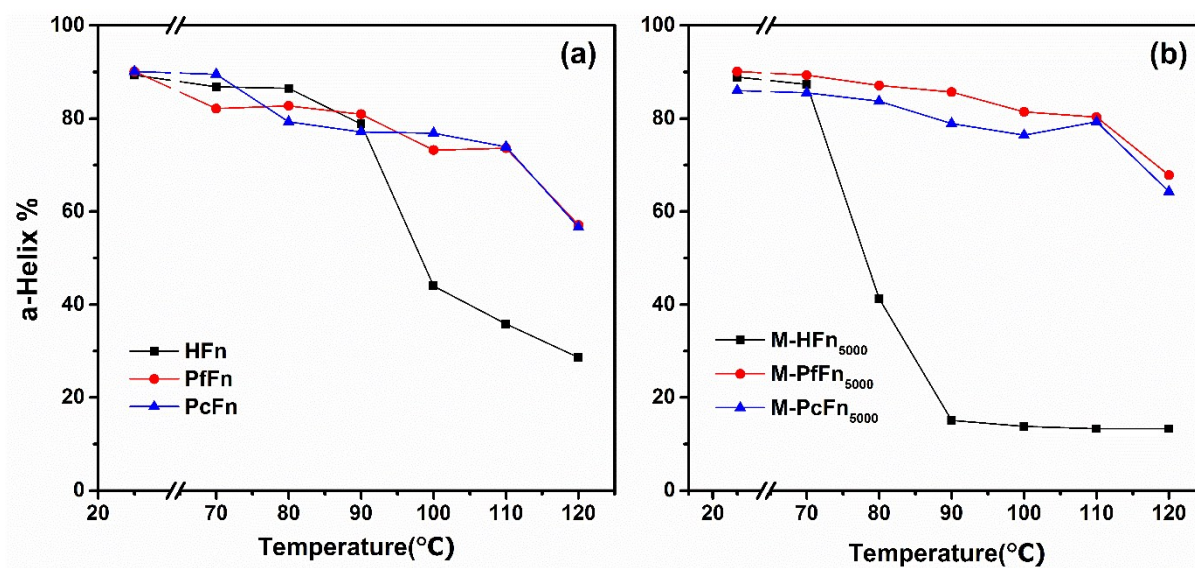

**Figure S4.**  $\alpha$ -Helix content of (a) ferritins (HFen, PfFn, and PcFn) and (b) magnetoferritins (M-HFn<sub>5000</sub>, M-PfFn<sub>5000</sub>, and M-PcFn<sub>5000</sub>) heated at different temperatures.

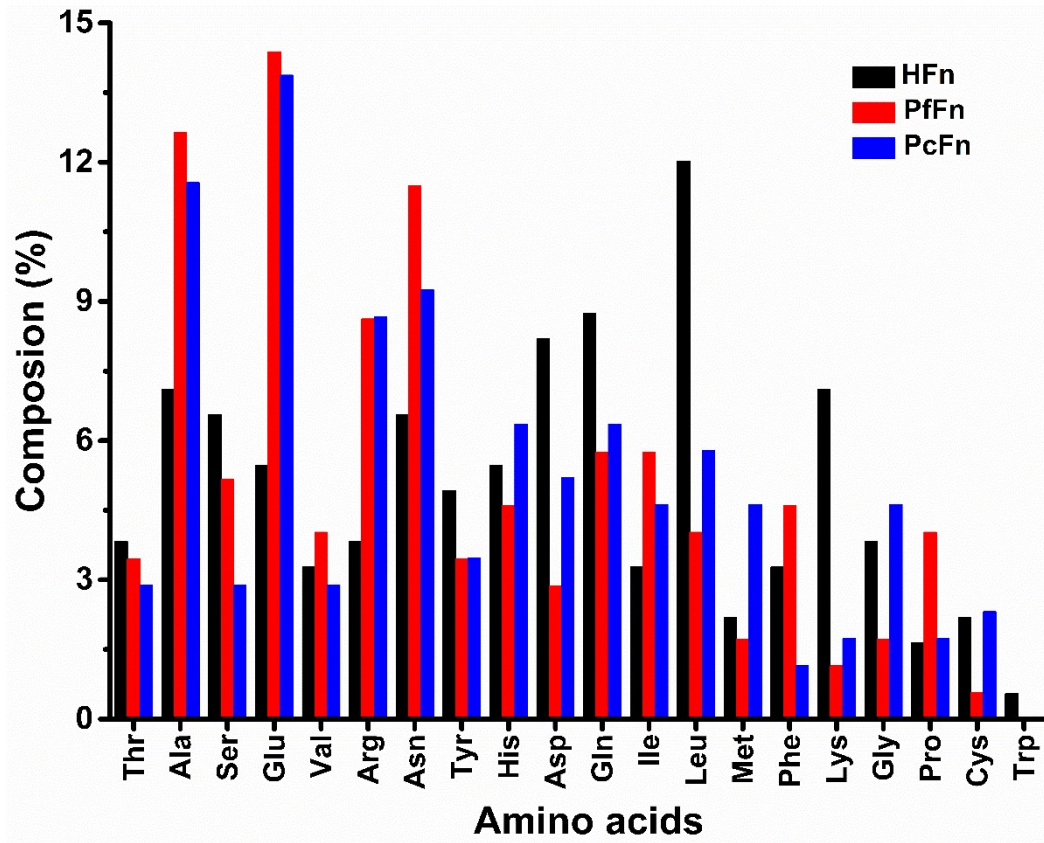

**Figure S5.** The distribution of mean amino acid composition. Black bars represent HFn, red bars represent PfFn, and blue bars represent PcFn.
